# Supplementary material for: Trans-Dominant Inhibition of Prion Propagation In Vitro Is Not Mediated by an Accessory Cofactor
Source: PLoS Pathog. 2009 Jul 31;5(7):e1000535. doi: 10.1371/journal.ppat.1000535 (PMC2713408; doi:10.1371/journal.ppat.1000535)
Supplement: Figure S2 — Regional neuropathology of hamsters inoculated with in vitro-generated PrPSc molecules. Vacuolation profile scores (A) and PrP 3F4 immunohistochemistry profiles (B) of animals inoculated with samples containing PrPSc molecules generated in vitro from Sc237-seeded 15-cycle sPMCA reactions containing PrPC (open squares) prepared from stably transfected CHO cells or (filled circles) isolated from hamster brain. For each, the mean values (n = 6–15 animals/group) are shown ±SEM. Brain regions: FC, frontal cortex; PC, parietal cortex; H, hippocampus; C, cerebellum; M, medulla. (0.31 MB PDF) [file ppat.1000535.s003.pdf]

**A**

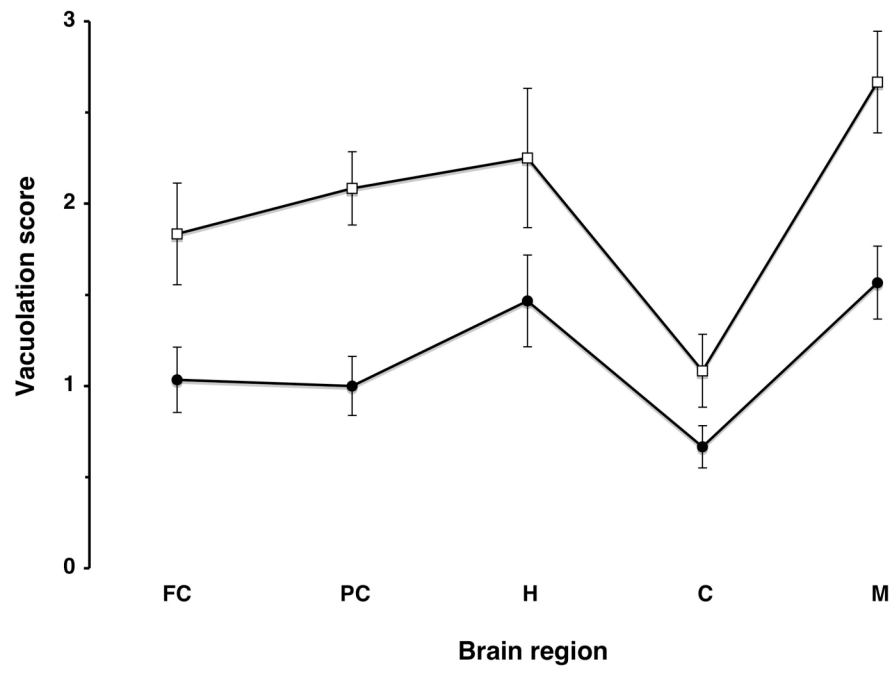

**B**

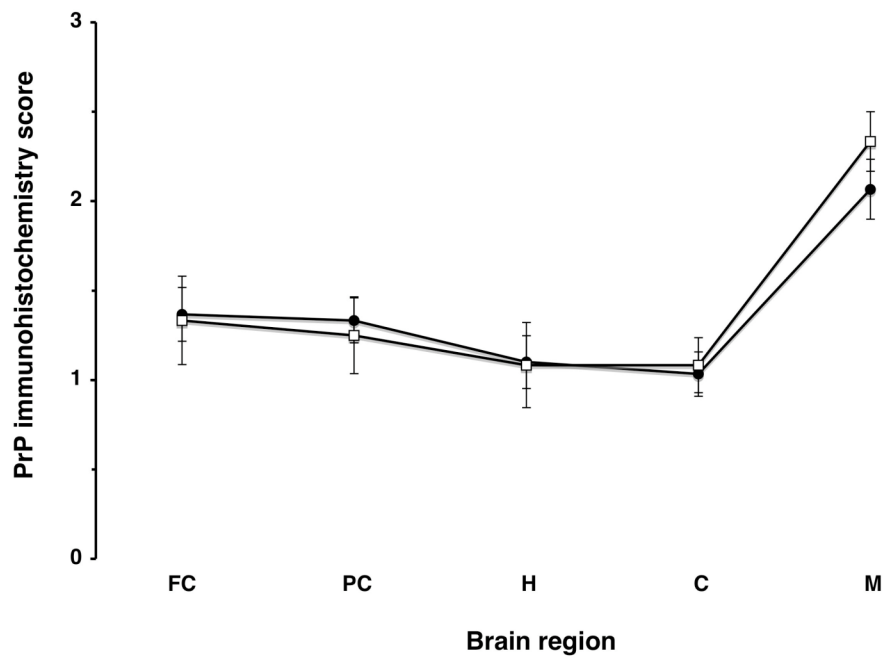

**Figure S2.**

**Regional neuropathology of hamsters inoculated with *in vitro*-generated PrP<sup>Sc</sup> molecules.**

Vacuolation profile scores (A) and PrP 3F4 immunohistochemistry profiles (B) of animals inoculated with samples containing PrP<sup>Sc</sup> molecules generated *in vitro* from Sc237-seeded 15-cycle sPMCA reactions containing PrP<sup>C</sup> (open squares) prepared from stably transfected CHO cells or (filled circles) isolated from hamster brain. For each, the mean values ( $n = 6-15$  animals/group) are shown  $\pm$ SEM. Brain regions: FC, frontal cortex; PC, parietal cortex; H, hippocampus; C, cerebellum; M, medulla.
